# Supplementary material for: Conformational Screening of Arbidol Solvates: Investigation via 2D NOESY
Source: MDPI journal article supplement (doi:10.3390/pharmaceutics15010226), 2023-01-09
Supplement: s1 [file s1]

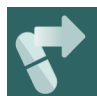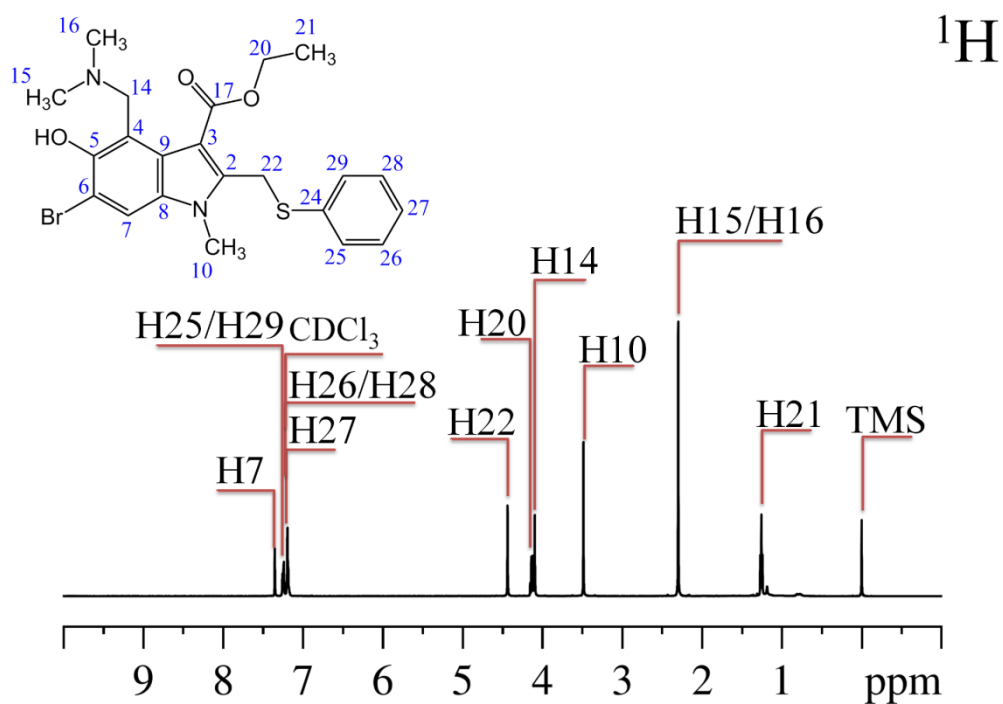

2

3

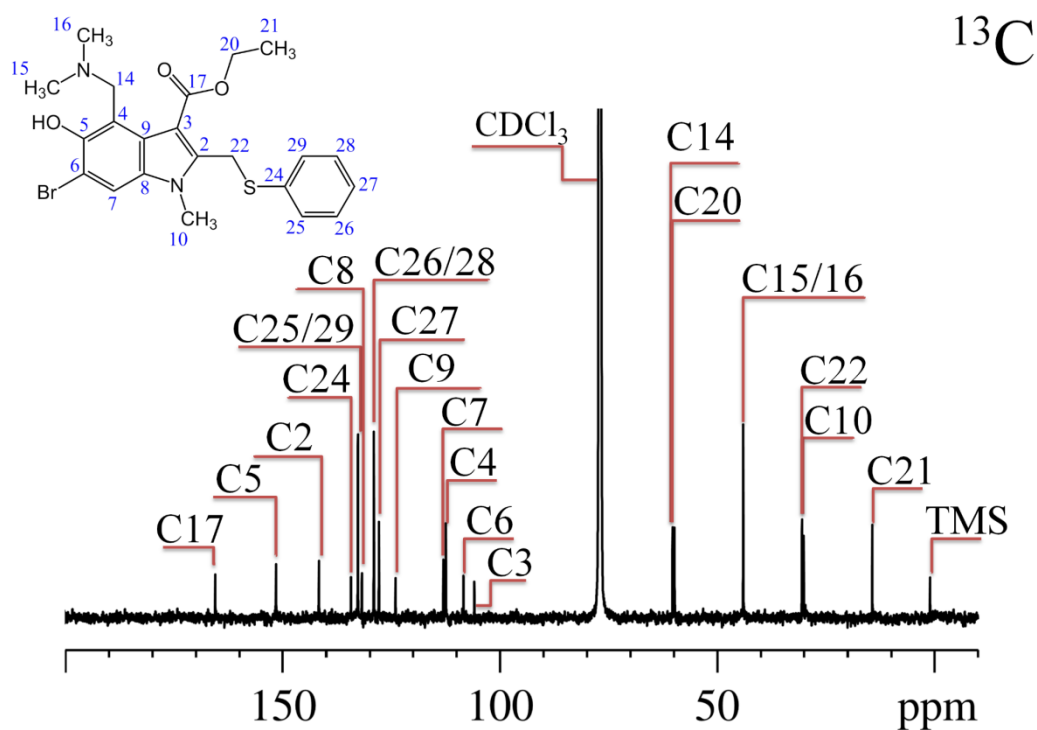

4

5

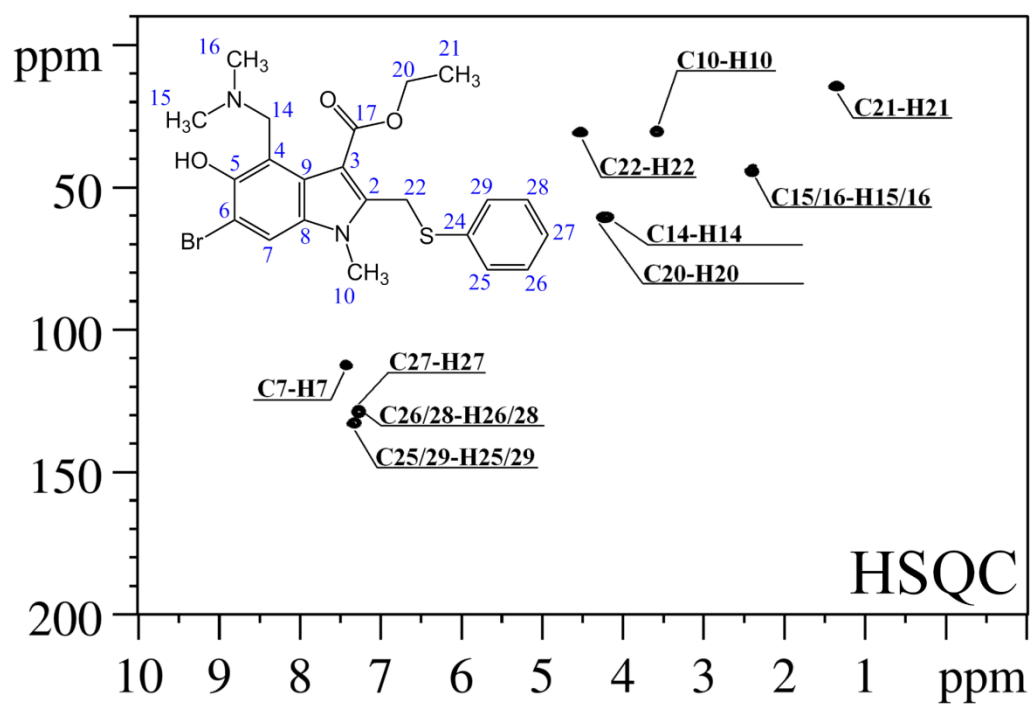Figure S3.  $^1\text{H}$ - $^{13}\text{C}$  HSQC spectrum of umifenovir in  $\text{CDCl}_3$ .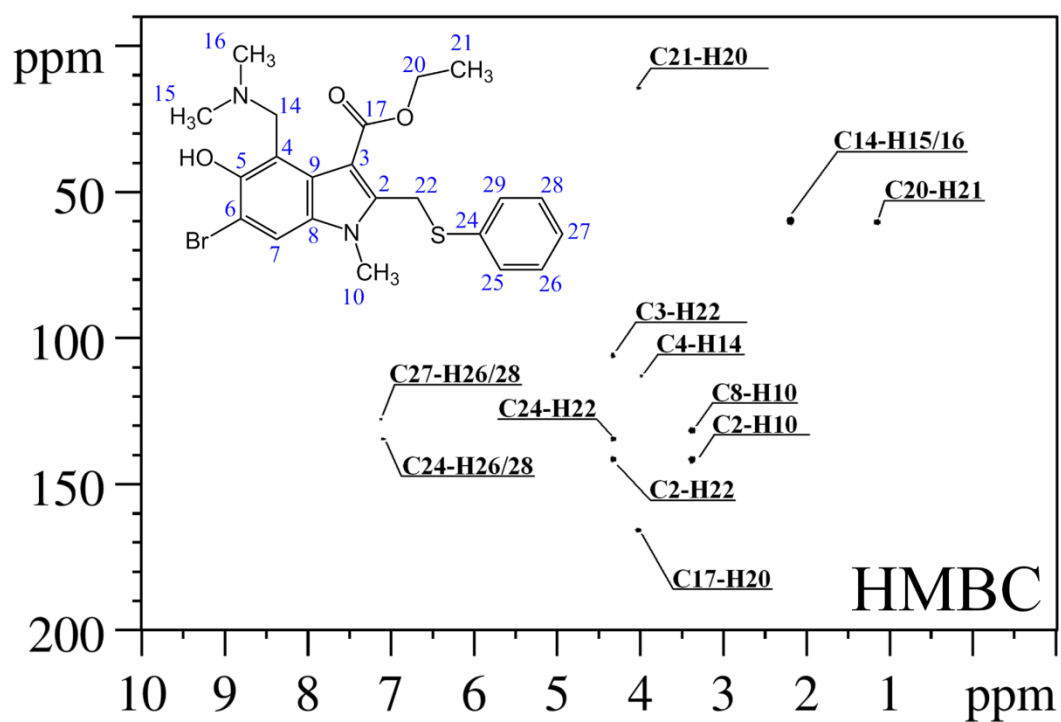Figure S4.  $^1\text{H}$ - $^{13}\text{C}$  HMBC NMR spectrum of umifenovir in  $\text{CDCl}_3$ .

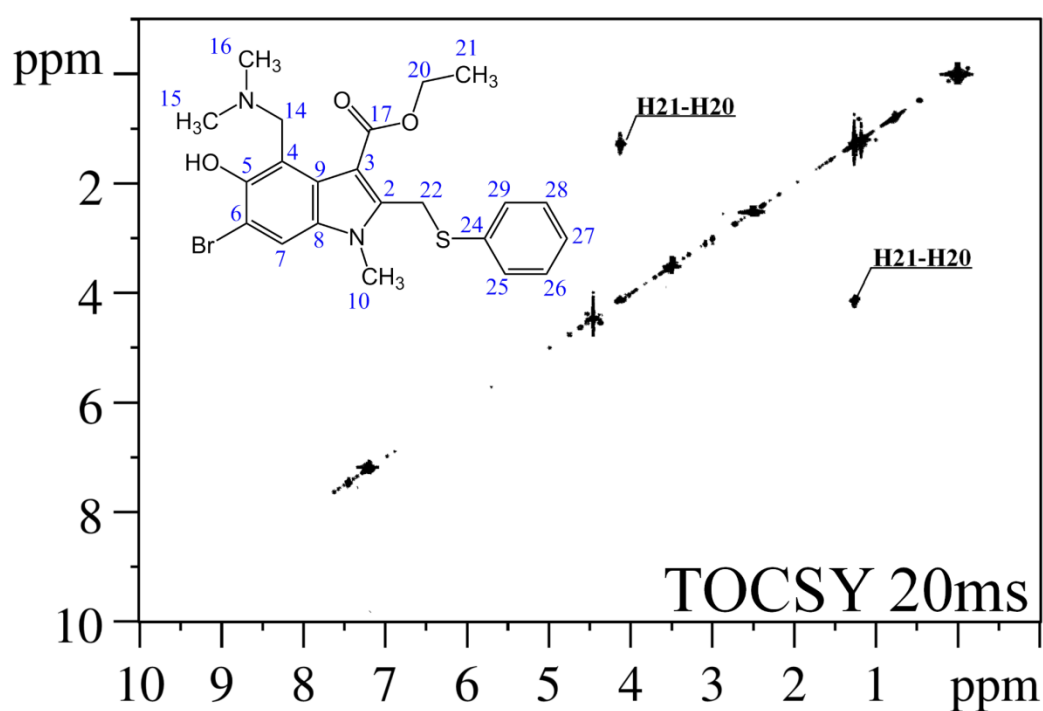Figure S5.  $^1\text{H}$ - $^1\text{H}$  TOCSY NMR spectrum of umifenovir in  $\text{CDCl}_3$  (mixing time 20 ms).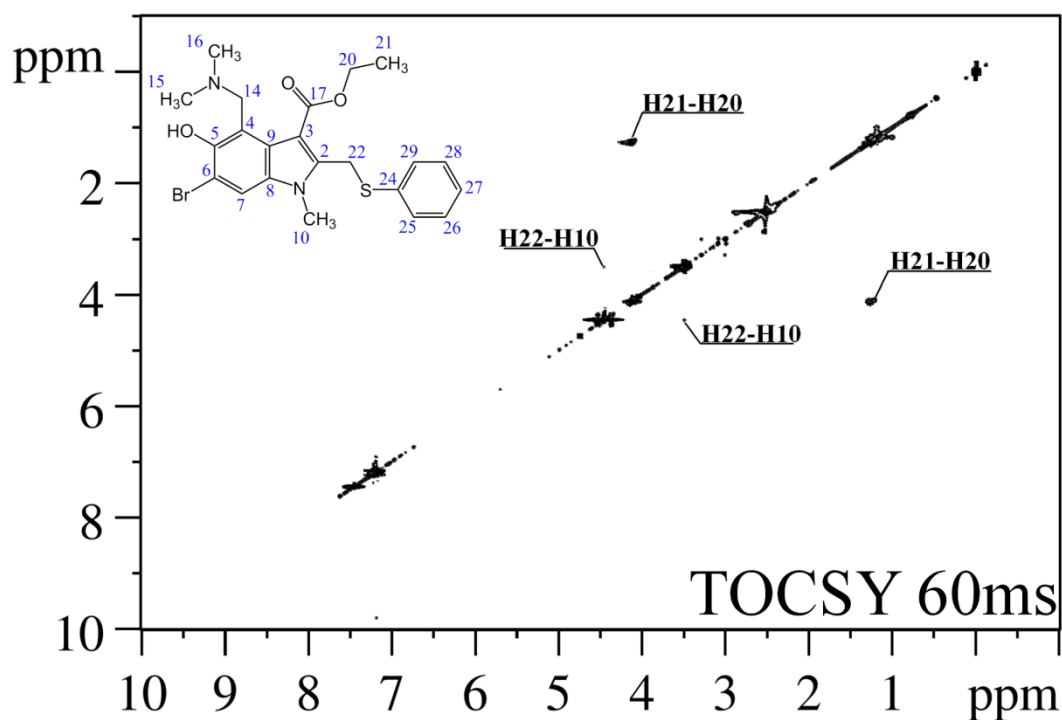Figure S6.  $^1\text{H}$ - $^1\text{H}$  TOCSY NMR spectrum of umifenovir in  $\text{CDCl}_3$  (mixing time 60 ms).

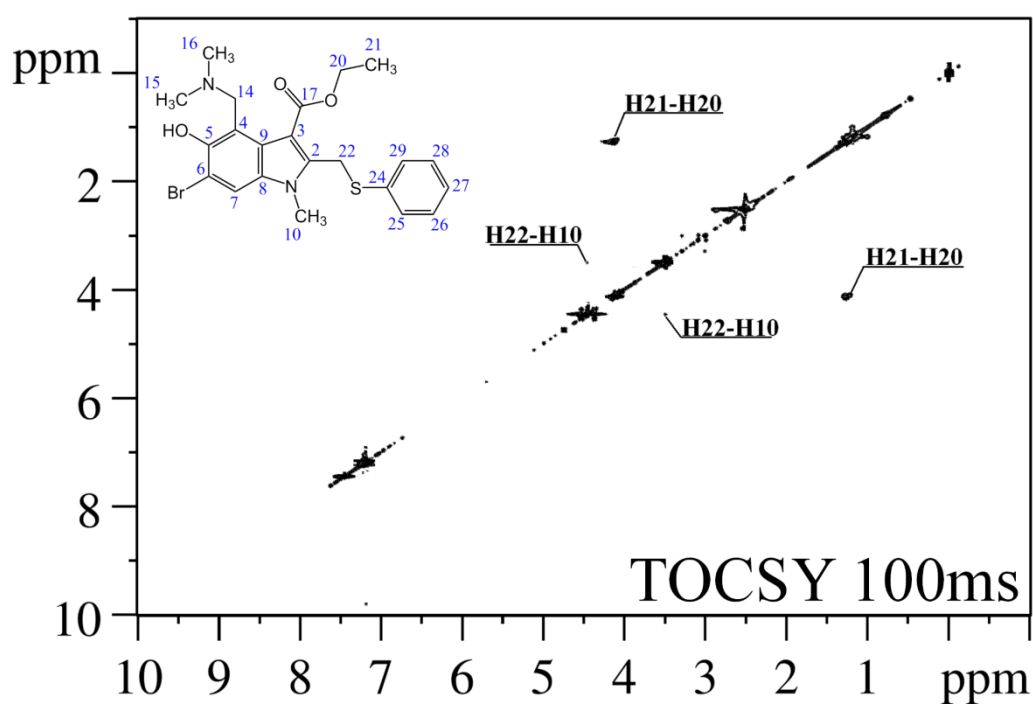Figure S7.  $^1\text{H}$ - $^1\text{H}$  TOCSY NMR spectrum of umifenovir in  $\text{CDCl}_3$  (mixing time 100 ms).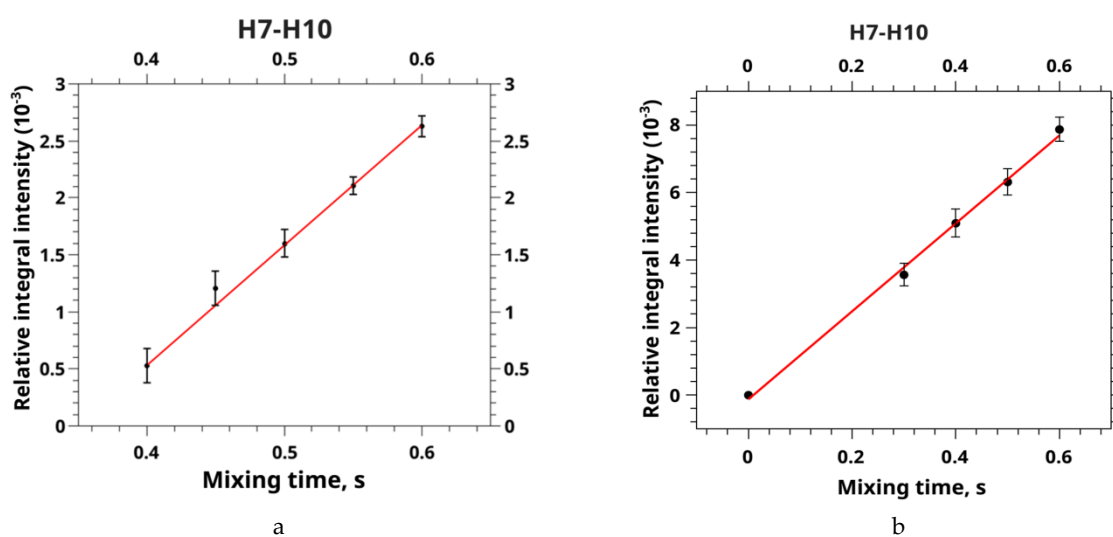Figure S8. Dependence of the average cross-peak intensity on the mixing time for the H7-H10 distance, obtained by analysis of the NOESY spectra of umifenovir in  $\text{CDCl}_3$ .

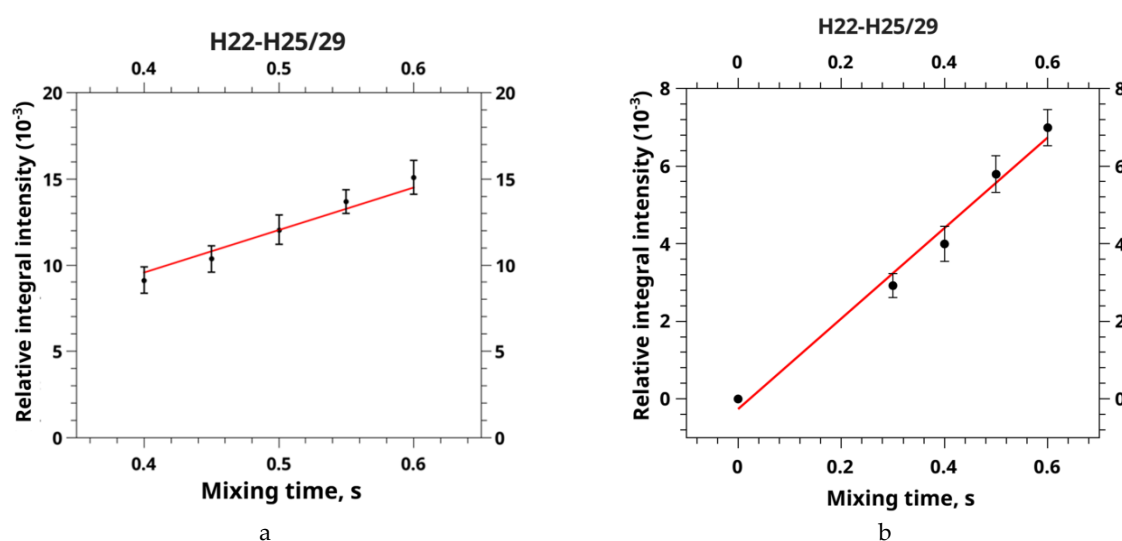

Figure S9. Dependence of the average cross-peak intensity on the mixing time for the H22-H25/29 distance, obtained by analysis of the NOESY spectra of umifenovir in  $\text{CDCl}_3$ .

Table S1.  $^1\text{H}$  and  $^{13}\text{C}$  chemical shifts and observed cross-correlation peaks in 2D spectra of umifenovir in  $\text{CDCl}_3$ .

| $\delta^{13}\text{C}$ | $^1\text{H}$ | $\delta^1\text{H}$ | HMBC                  | HSQC                | TOCSY       |             |             | NOESY           | $^{13}\text{C}$ |
|-----------------------|--------------|--------------------|-----------------------|---------------------|-------------|-------------|-------------|-----------------|-----------------|
|                       |              |                    |                       |                     | 20ms        | 60ms        | 100ms       |                 |                 |
| 141.20                | -            | -                  | C2-H10<br>C2-H22      | -                   | -           | -           | -           | -               | C2              |
| 106.21                | -            | -                  | C3-H22                | -                   | -           | -           | -           | -               | C3              |
| 113.51                | -            | -                  | C4-H14                | -                   | -           | -           | -           | -               | C4              |
| 152.25                | OH           | 1.31               |                       | -                   | -           | -           | -           | -               | C5              |
| 108.76                | -            | -                  |                       | -                   | -           | -           | -           | -               | C6              |
| 112.86                | H7           | 7.35               |                       | C7-H7               | -           | -           | -           | H7-H10          | C7              |
| 131.77                | -            | -                  | C8-H10                | -                   | -           | -           | -           | -               | C8              |
| 124.41                | -            | -                  |                       | -                   | -           | -           | -           | -               | C9              |
| 28.97                 | H10          | 3.49               |                       | C10-H10             | -           | -           | -           | H10-H22         | C10             |
| 59.74                 | H14          | 4.10               | C14-H15/16            | C14-H14             | -           | -           | -           | H14-H15/<br>H16 | C14             |
| 43.37                 | H15/H16      | 2.30               |                       | C15/C16-H<br>15-H16 | -           | -           | -           | -               | C15/C16         |
| 165.09                | -            | -                  | C17-H20               | -                   | -           | -           | -           | -               | C17             |
| 59.66                 | H20          | 4.13               | C20-H21               | C20-H20             | -           | -           | -           | H20-H21         | C20             |
| 14.04                 | H21          | 1.26               | C21-H20               | C21-H21             | -           | H20-H2<br>1 | H20-H<br>21 | -               | C21             |
| 29.90                 | H22          | 4.44               | -                     | C22-H22             | H20-H2<br>1 | H22-H1<br>0 | H22-H<br>10 | H22-H25/<br>H29 | C22             |
| 134.92                | -            | -                  | C24-H22<br>C24-H26/28 | -                   | -           | -           | -           | -               | C24             |
| 132.18                | H25-H29      | 7.25               |                       | C25/C29-H<br>25/H29 | -           | -           | -           | -               | C25/C29         |
| 128.81                | H26/H28      | 7.20               |                       | C26/C28-H<br>26/H28 | -           | -           | -           | -               | C26/C28         |
| 127.31                | H27          | 7.19               | C27-H26/28            | C27-H27             | -           | -           | -           | -               | C27             |

Table S2. Spatial structure of the conformers of umifenovir obtained by CCDC.

19

| S                                                                                   |                                                                                      |
|-------------------------------------------------------------------------------------|--------------------------------------------------------------------------------------|
| A                                                                                   | B                                                                                    |
| 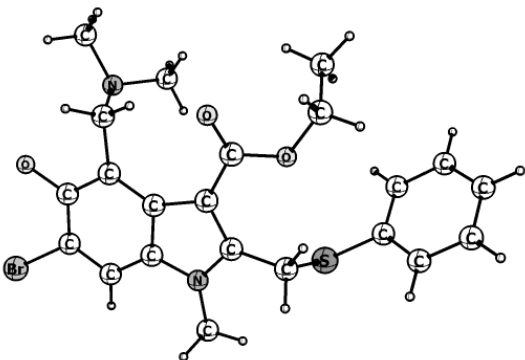   |    |
| C                                                                                   | D                                                                                    |
|   |   |
| E                                                                                   | F                                                                                    |
|  |  |
| P                                                                                   |                                                                                      |

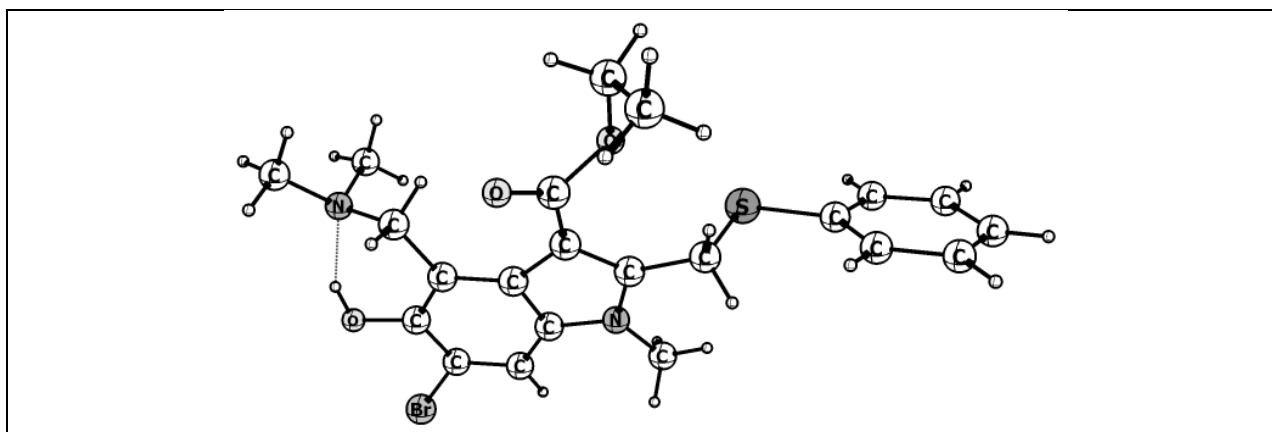

Table S3. Values of the dihedral angle  $\tau_1$  of the umifenovir molecule in the considered conformers.

| Conformer | Values of the dihedral angle, ° |        |
|-----------|---------------------------------|--------|
|           |                                 |        |
|           | $\tau_1$ (C22-S1-C24-C29)       |        |
| S         | A                               | -119.9 |
|           | B                               | -119.9 |
|           | C                               | -92.9  |
|           | D                               | -76.2  |
|           | E                               | -117.8 |
|           | F                               | 67.8   |
| P         | 169.2                           |        |

Table S4. Conformation-dependent and reference distances in the umifenovir molecule.

| r (H7-H10), Å |   |      | r (H22-H25/29), Å |   |      |
|---------------|---|------|-------------------|---|------|
| Conf.         |   | r, Å | Conf.             |   | r, Å |
| S             | A | 2.94 | S                 | A | 3.21 |
|               | B | 2.94 |                   | B | 3.21 |
|               | C | 2.78 |                   | C | 3.72 |
|               | D | 2.92 |                   | D | 3.96 |
|               | E | 2.75 |                   | E | 3.36 |
|               | F | 2.76 |                   | F | 3.80 |
| P             |   | 2.96 | P                 |   | 2.59 |

20

21

22

23

24
